# Supplementary material
Source: Springer Nature journal article supplement (https://www.springermedizin.de/resource/supplementary/12990_2010_283_MOESM1_ESM.pdf/9612944)
Supplement: MOESM1 [file 9612944]

**A**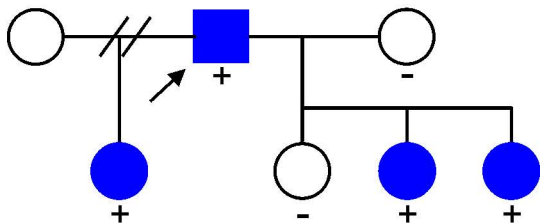**B**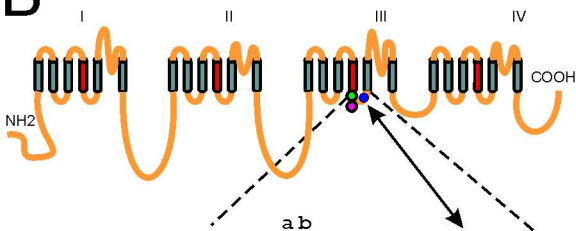

|                                       |                                                          |
|---------------------------------------|----------------------------------------------------------|
| Na <sub>v</sub> 1.1                   | EGMR <b>V</b> VVNALLGAI <b>P</b> SI <b>M</b> IN          |
| Na <sub>v</sub> 1.2                   | EGMR <b>V</b> VVNALLGAI <b>P</b> SI <b>M</b> IN          |
| Na <sub>v</sub> 1.3                   | EGMR <b>V</b> VVNALVGAI <b>P</b> SI <b>M</b> IN          |
| Na <sub>v</sub> 1.4                   | EGMR <b>V</b> VVNALLGAI <b>P</b> SI <b>M</b> IN          |
| Na <sub>v</sub> 1.5                   | EGMR <b>V</b> VVNALVGAI <b>P</b> SI <b>M</b> IN          |
| Na <sub>v</sub> 1.6                   | EGMR <b>V</b> VVNALVGAI <b>P</b> SI <b>M</b> IN          |
| Na <sub>v</sub> 1.7                   | EGMR <b>V</b> VVNALIGAI <b>P</b> SI <b>M</b> IN          |
| Na <sub>v</sub> 1.8                   | EGMR <b>V</b> VVDALVGAI <b>P</b> SI <b>M</b> IN          |
| Na <sub>v</sub> 1.9                   | EGMK <b>V</b> VVNALIGAI <b>P</b> AI <b>L</b> IN          |
| Na <sub>v</sub> 1.7 <sub>P1308L</sub> | EGMR <b>V</b> VVNALIGAI <b>L</b> SI <b>M</b> IN          |
| Na <sub>v</sub> 1.7 <sub>V1298F</sub> | EGMR <b>F</b> VVNALIGAI <b>P</b> SI <b>M</b> IN          |
| Na <sub>v</sub> 1.7 <sub>V1298D</sub> | EGMR <b>D</b> VVNALIGAI <b>P</b> SI <b>M</b> IN          |
| Na <sub>v</sub> 1.7 <sub>V1299F</sub> | EGMR <b>V</b> <b>F</b> VVNALIGAI <b>P</b> SI <b>M</b> IN |
